# Supplementary material for: Phase-vanishing halolactonization of neat substrates
Source: publisher site journal article supplement (doi:10.3762/bjoc.4.29), 2008-08-11
Supplement: Additional file 2 [file 1860-5397-4-29-S2.pdf]

## Supporting Information

### Phase-vanishing halolactonization of neat substrates

Nicole Windmon<sup>1</sup> and Veljko Dragojlovic<sup>2,\*</sup>

<sup>1</sup>Department of Chemistry, Florida Atlantic University, 777 Glades Road, Boca Raton, Florida 33431, USA.

<sup>2</sup>Wilkes Honors College of Florida Atlantic University, 5353 Parkside Drive, Jupiter, Florida, 33458, USA.

Veljko Dragojlovic – [vdragojl@fau.edu](mailto:vdragojl@fau.edu)

\*corresponding author

GC-MS spectra of the compounds **2**, **3**, **4**, **5**, **8**, **13**, **18**, **19**, **21**, **22** and  $^1\text{H}$  NMR spectra of the compounds **2**, **4**, **5**, **8**, **13**, **18**, **19**, **21**, **22**.

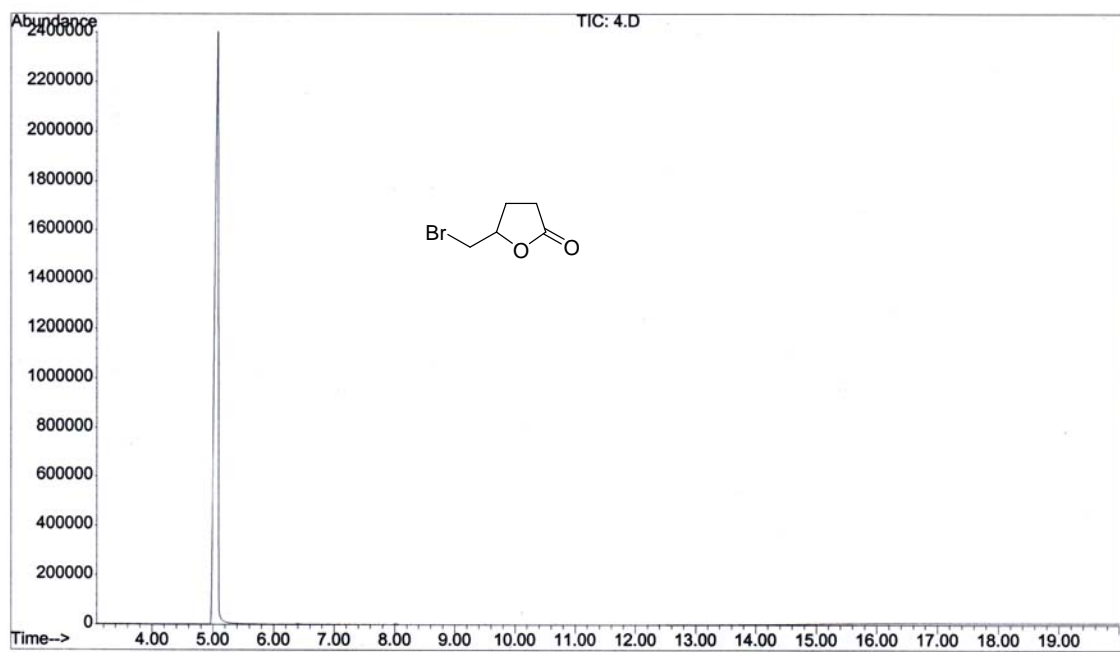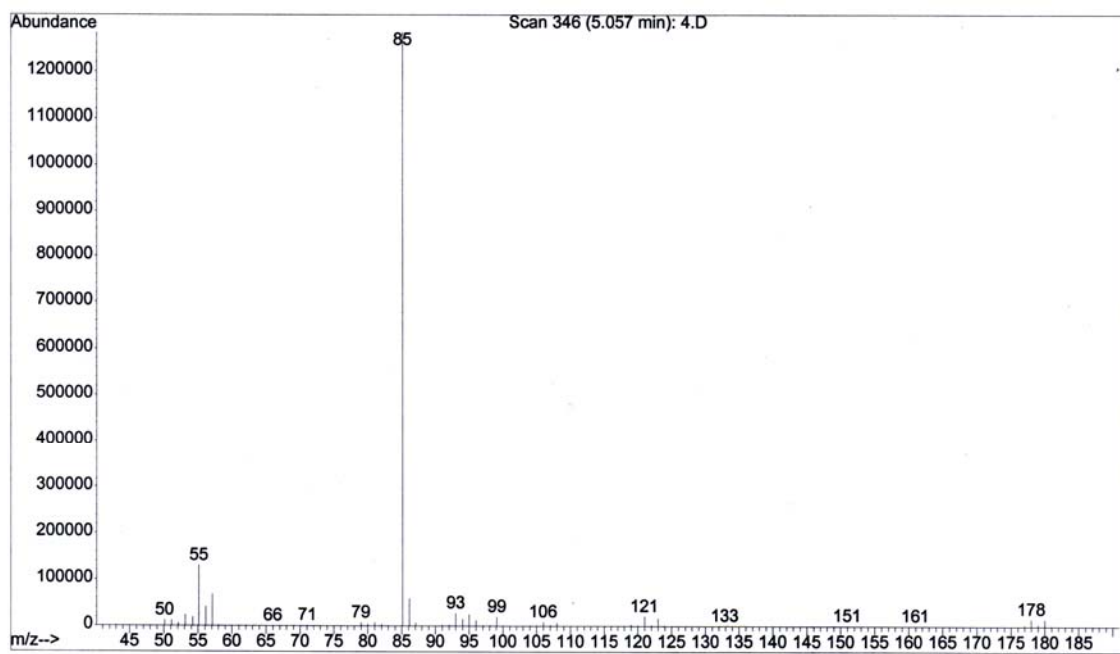

GC-MS of 5-(bromomethyl)-dihydrofuran-2(3H)-one (**2**).

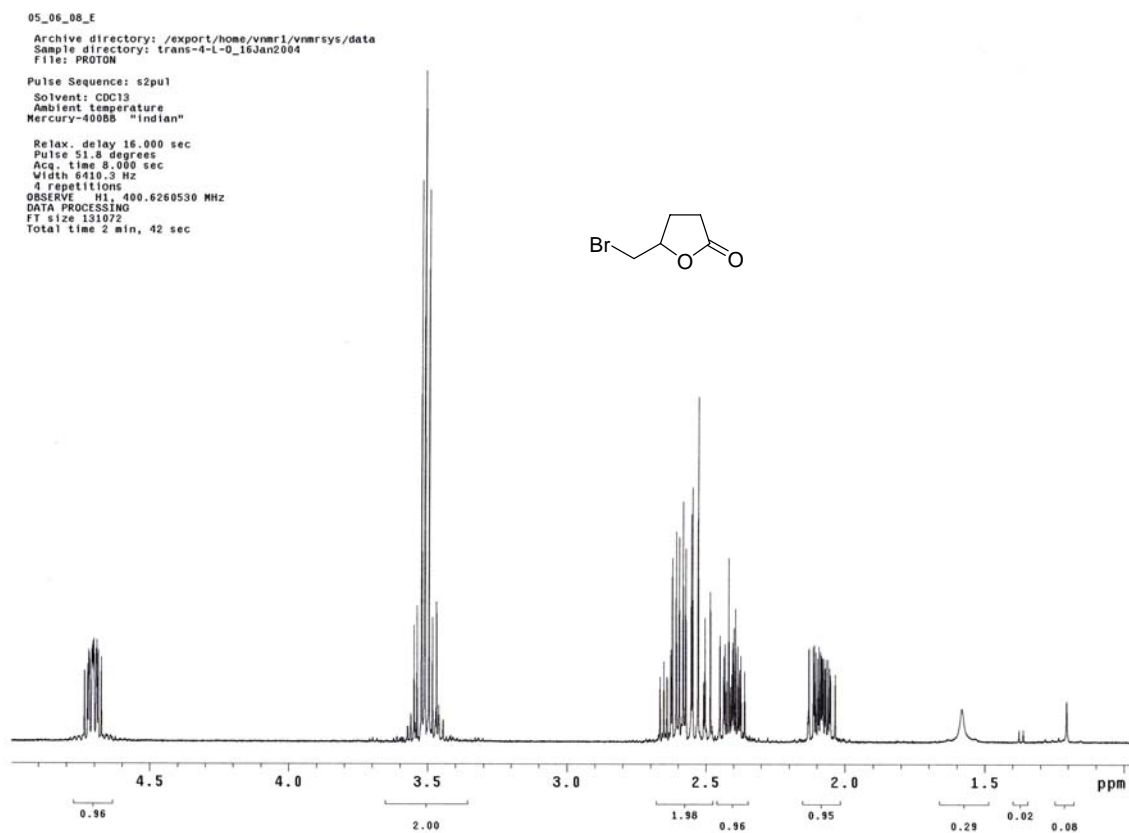

$^1\text{H}$  NMR of 5-(bromomethyl)-dihydrofuran-2(3H)-one (**2**).



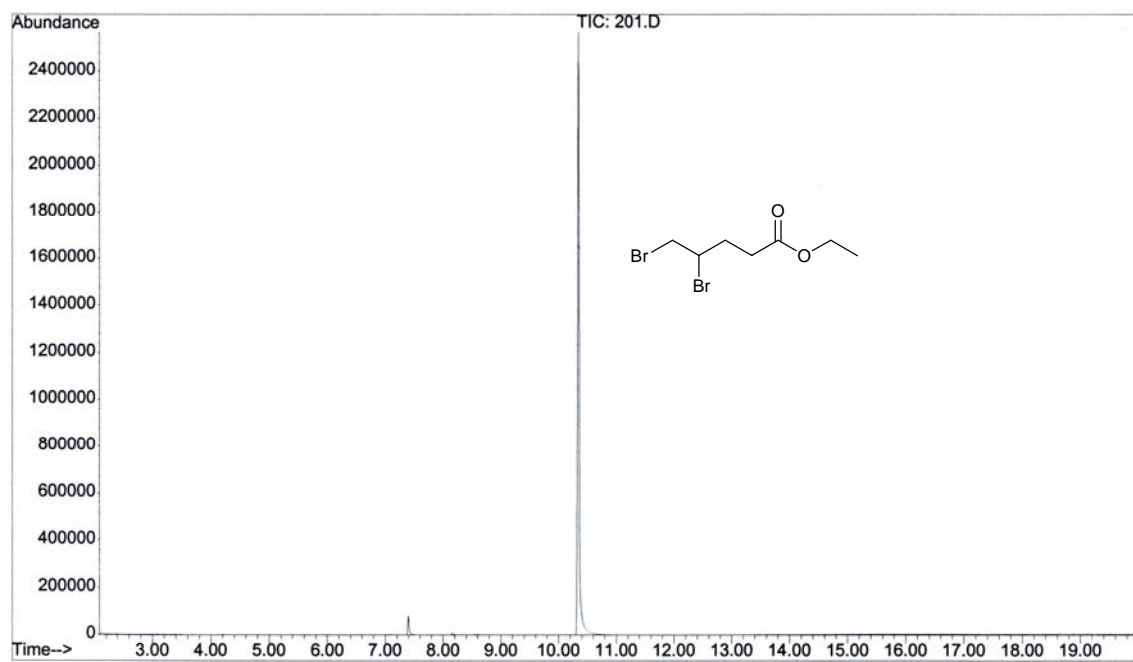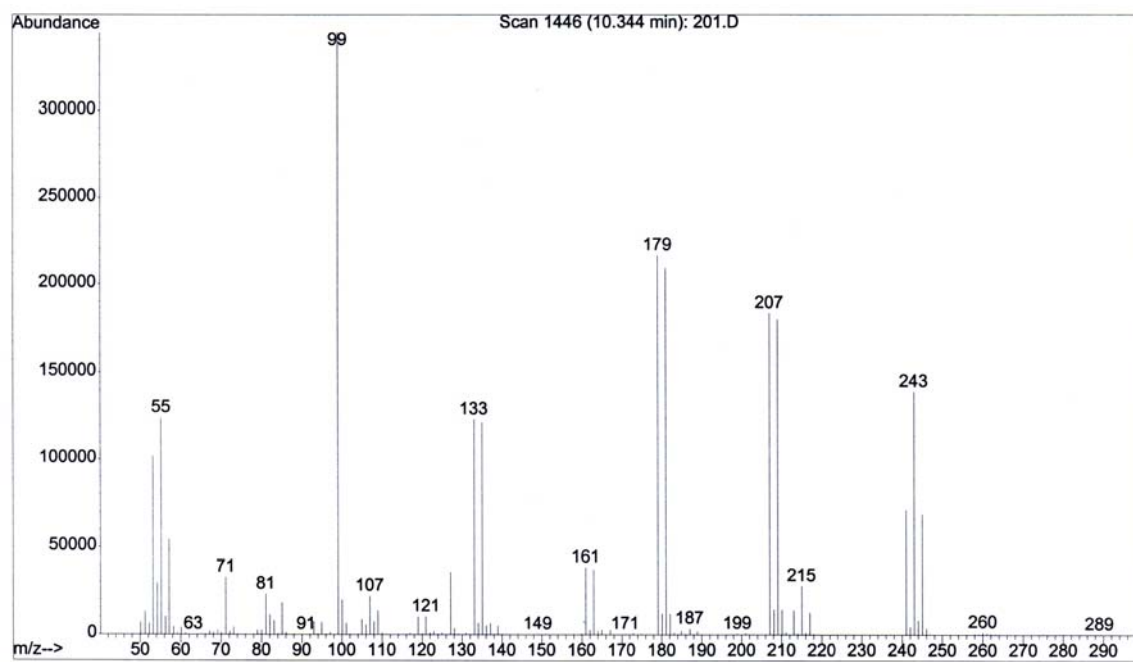

GC-MS of ethyl 4,5-dibromopentanoate (**4**).

05\_23\_08\_B\_1H\_NMR  
Archive directory: /export/home/vnmr1/vnmrsys/data  
Sample directory: trans-4-l-0\_16Jan2004  
Pulse Sequence: s2pul  
Solvent: CDCl3  
Ambient temperature  
File: 05\_23\_08\_B\_1H\_NMR  
Mercury-400BB "Indian"  
Relax. delay 8.000 sec  
Pulse 15.1 degrees  
Acq. time 4.000 sec  
Width 6410.3 Hz  
64 repetitions  
OBSERVE H1 400.6260371 MHz  
DATA PROCESSING  
FT size 65536  
Total time 13 min, 33 sec

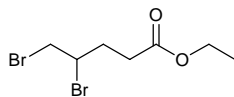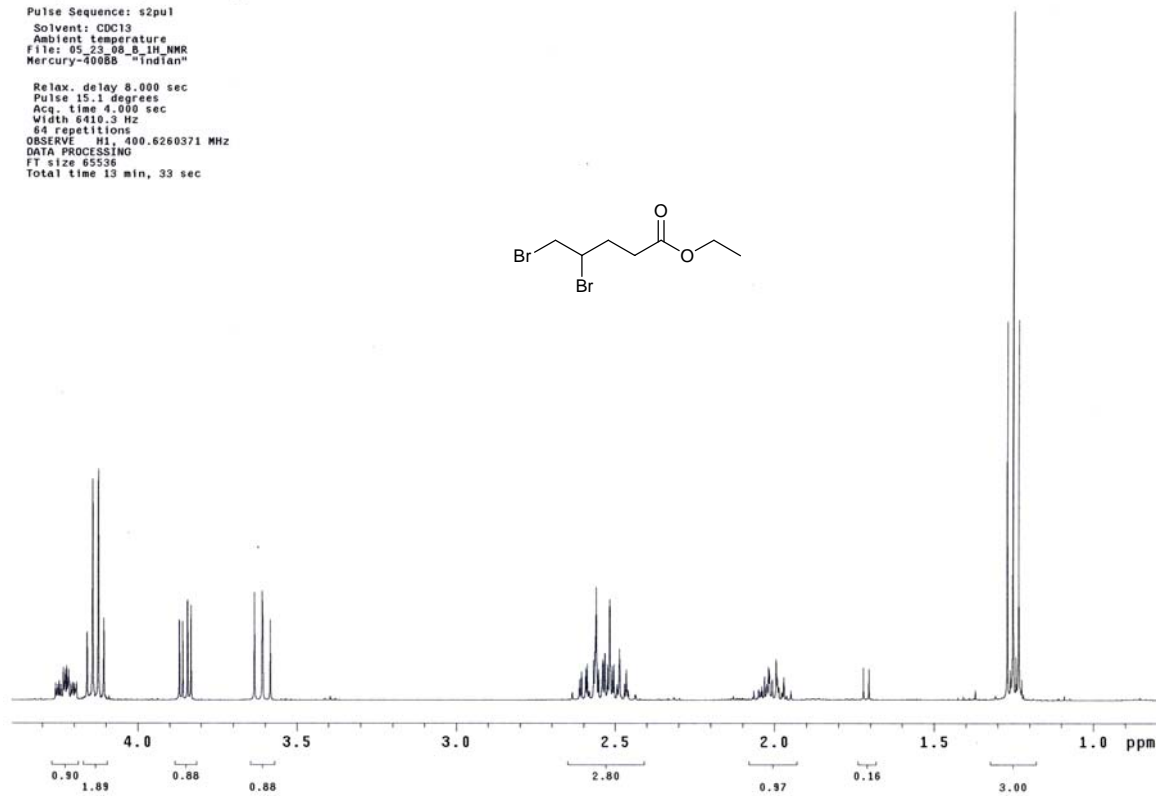

<sup>1</sup>H NMR of ethyl 4,5-dibromopentanoate (**4**).

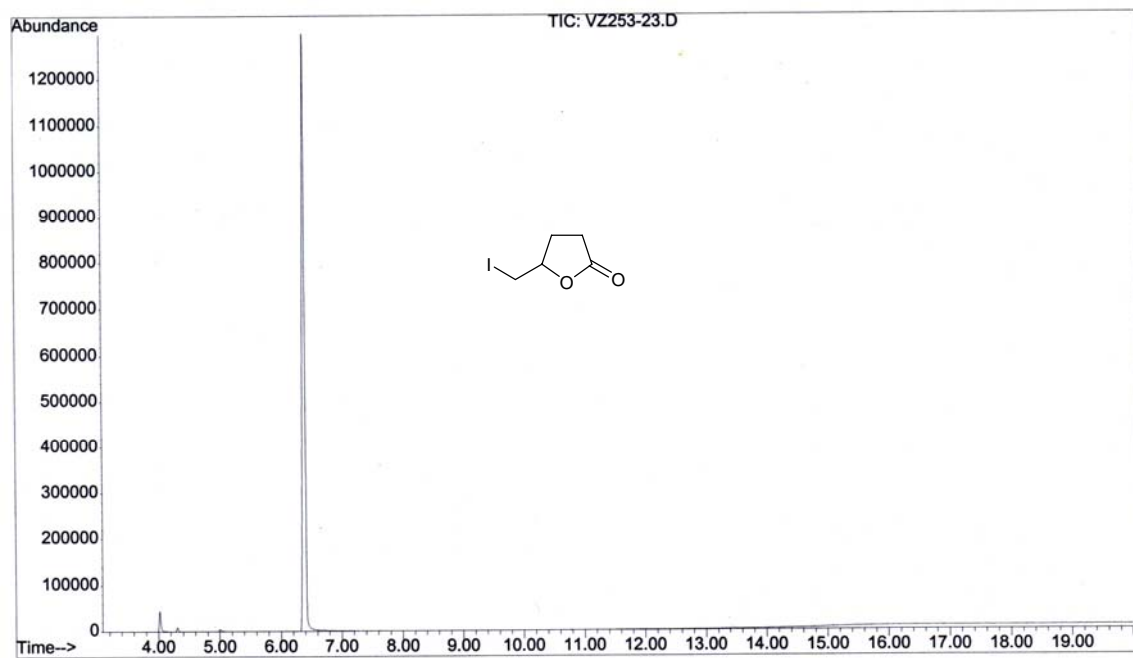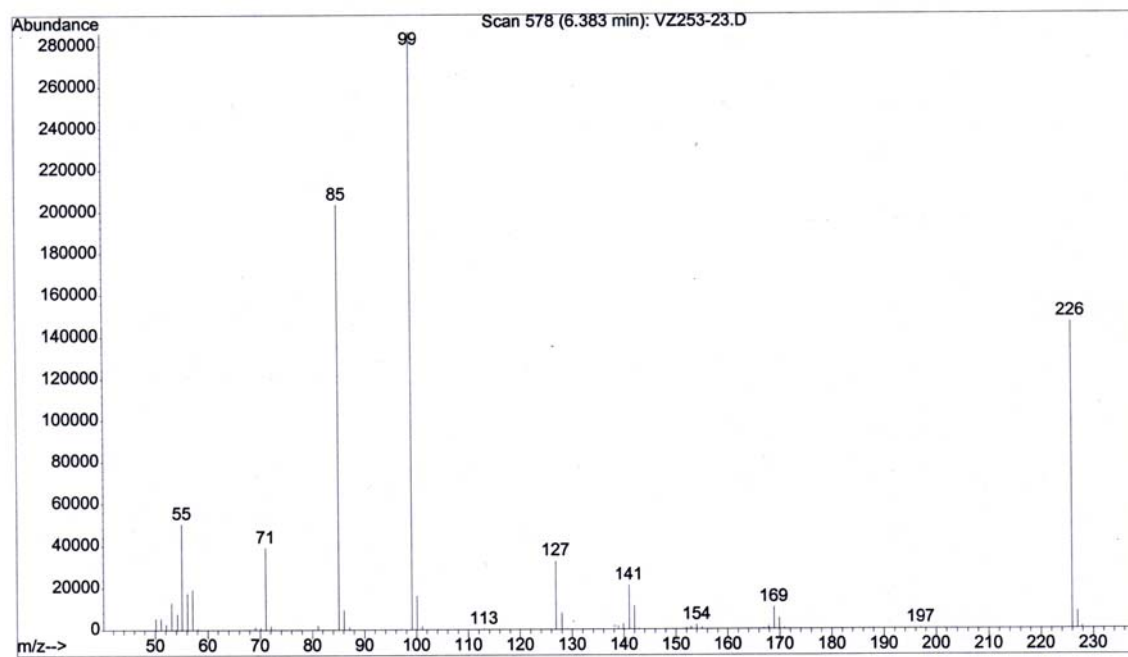

GC-MS of 5-(iodomethyl)-dihydrofuran-2(3H)-one (**5**).

05\_06\_08\_C  
Archive directory: /export/home/vmr1/vmrsys/data  
Sample directory: trans-4-L-0\_16Jan2004  
File: PROTON  
Pulse Sequence: s2pu1  
Solvent: CDCl3  
Ambient temperature  
Mercury-400BB "indian"  
Relax. delay 2.000 sec  
Pulse 51.0 degrees  
Acq. time 2.000 sec  
Width 610.3 Hz  
2 repetitions  
OBSERVE H1, 400.6260335 MHz  
DATA PROCESSING  
FT size 32768  
Total time 0 min, 21 sec

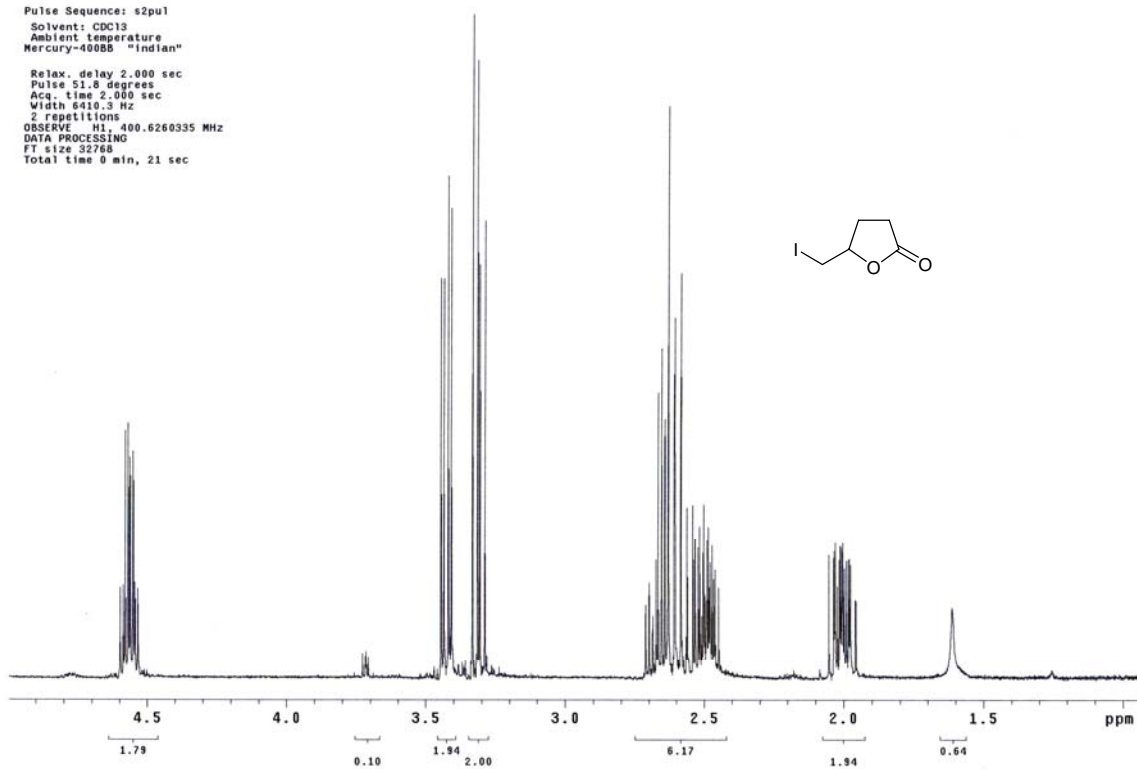

<sup>1</sup>H NMR of 5-(iodomethyl)-dihydrofuran-2(3H)-one (5).



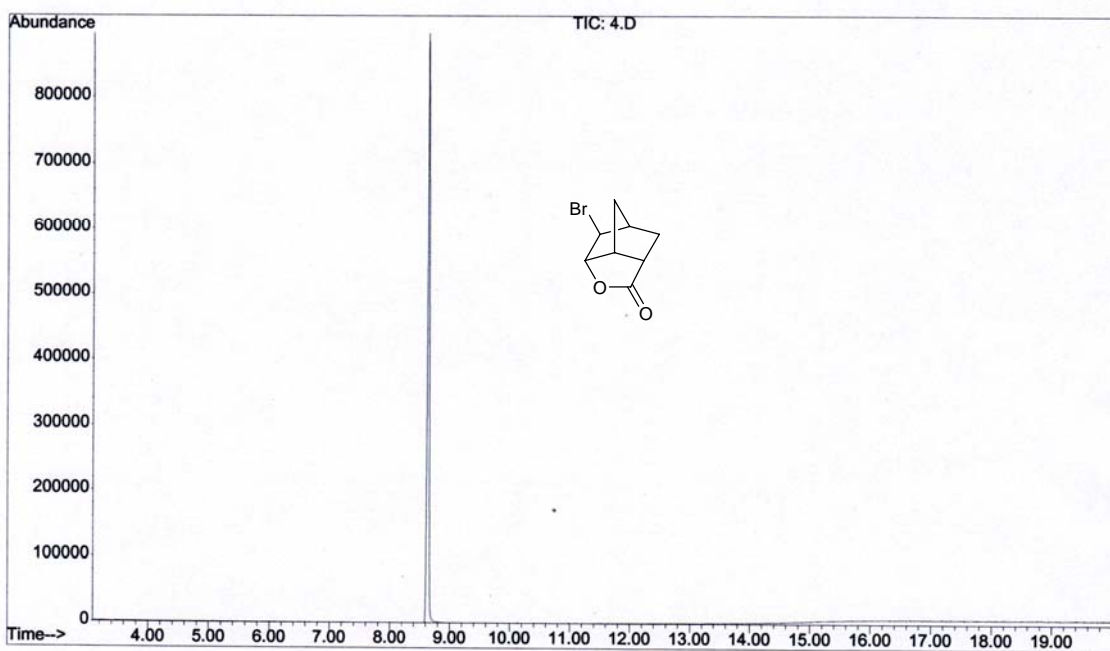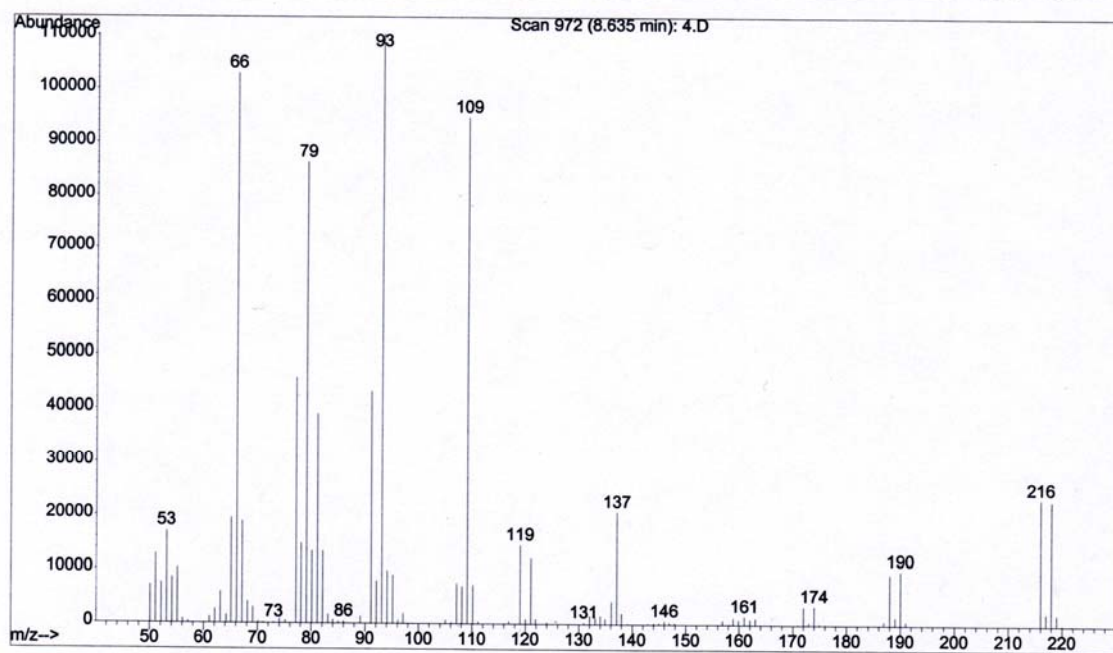GC-MS of bromolactone **8**.

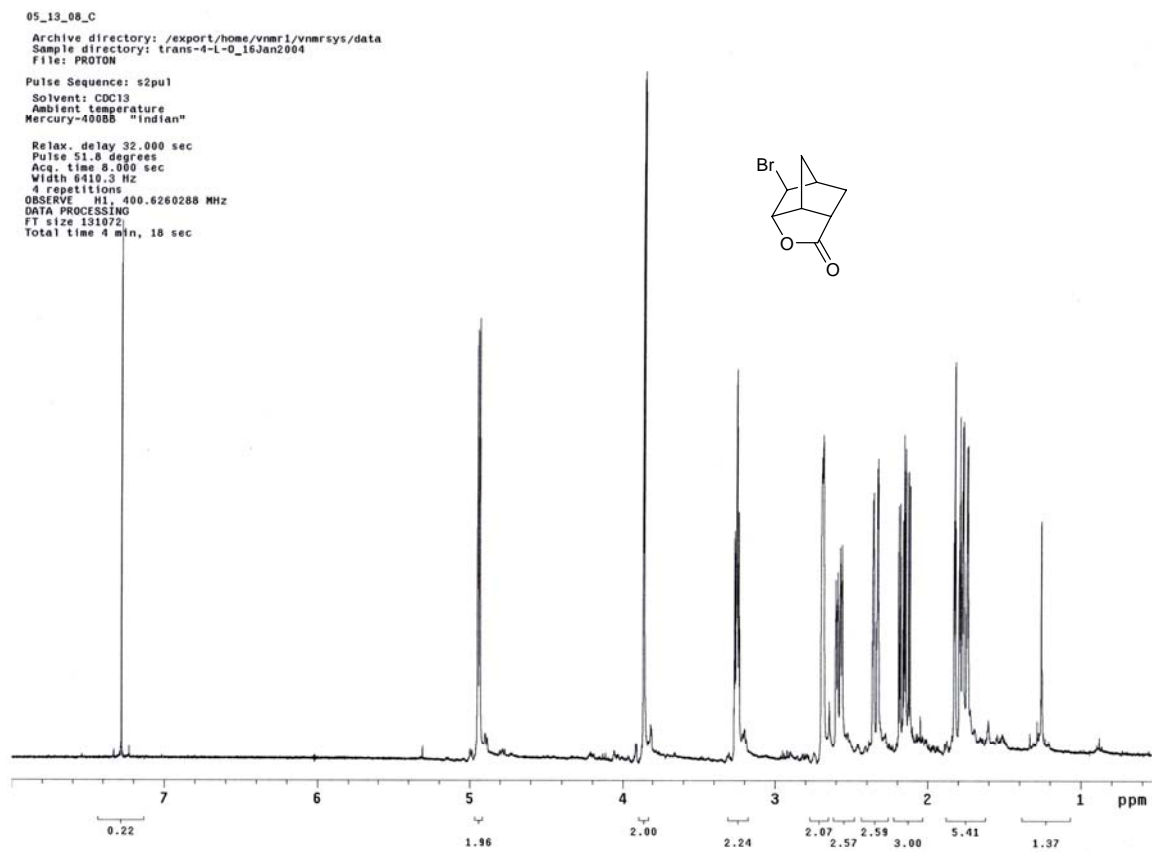

$^1\text{H}$  NMR of bromolactone **8**.

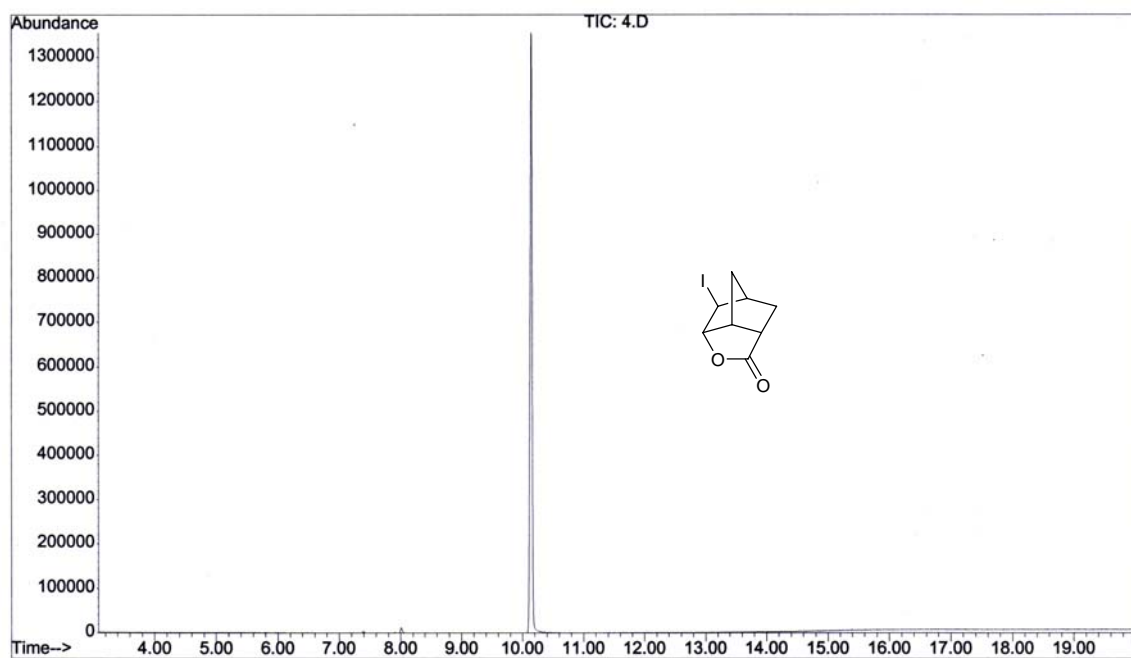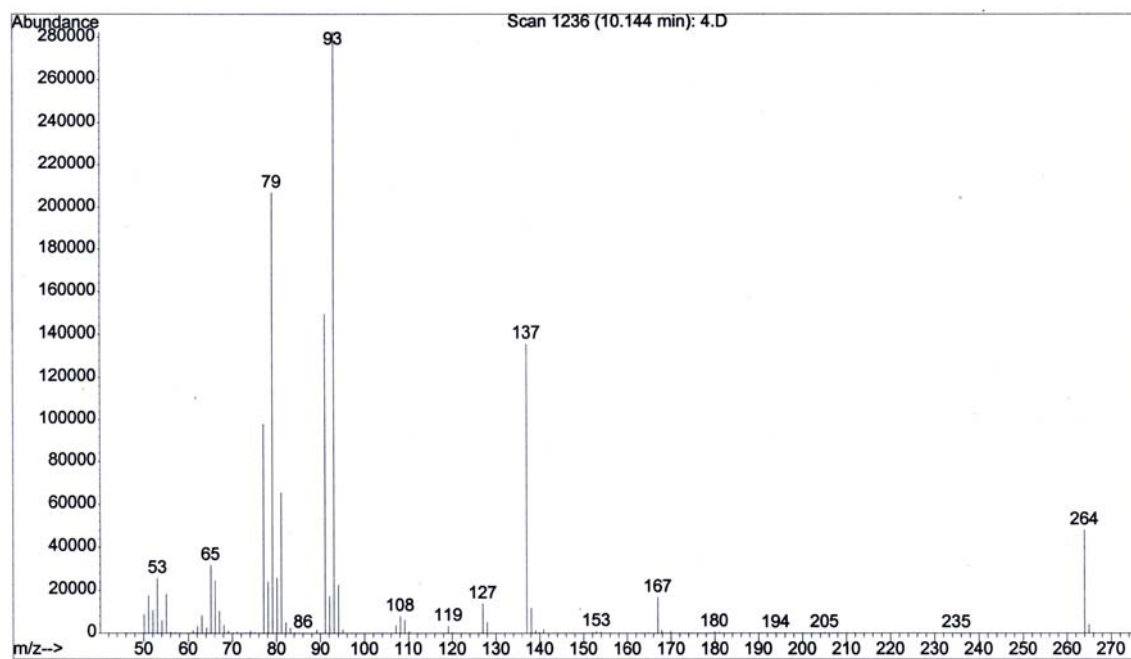GC-MS of iodolactone **13**.

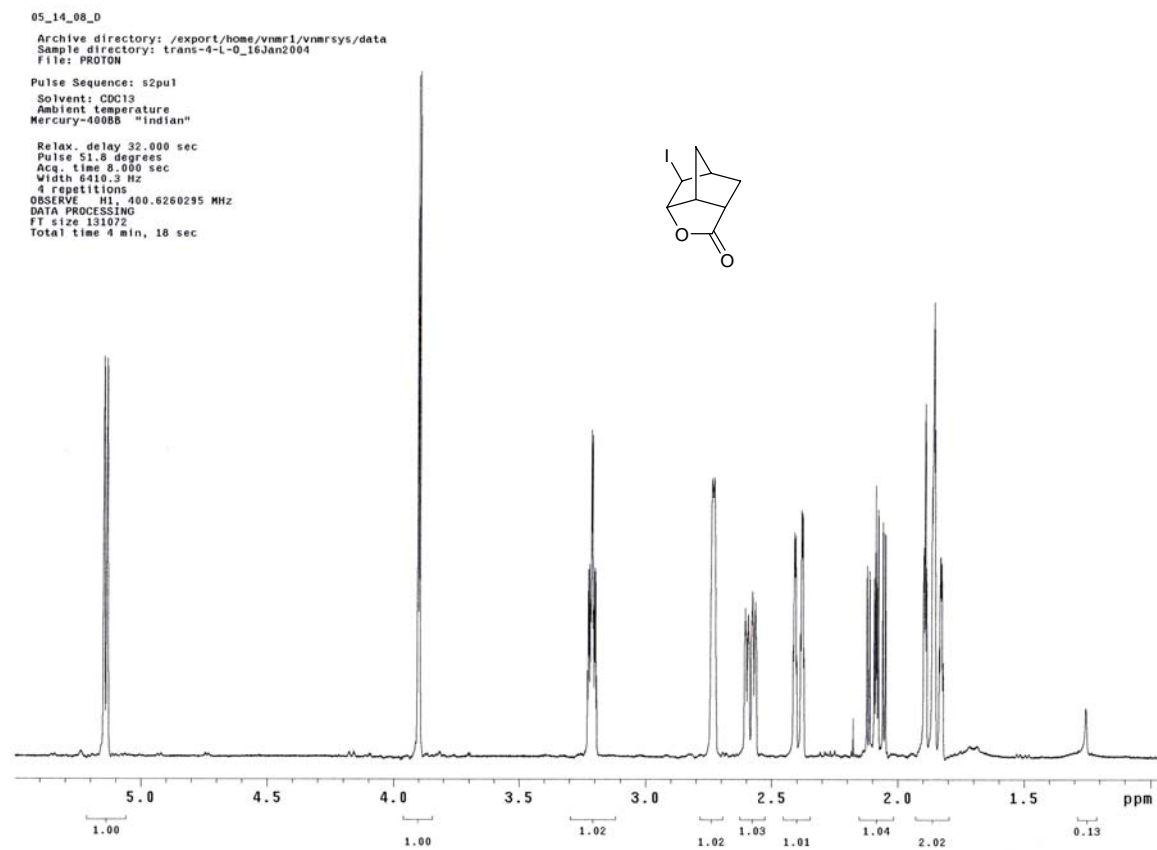

$^1\text{H}$  NMR of iodolactone **13**.

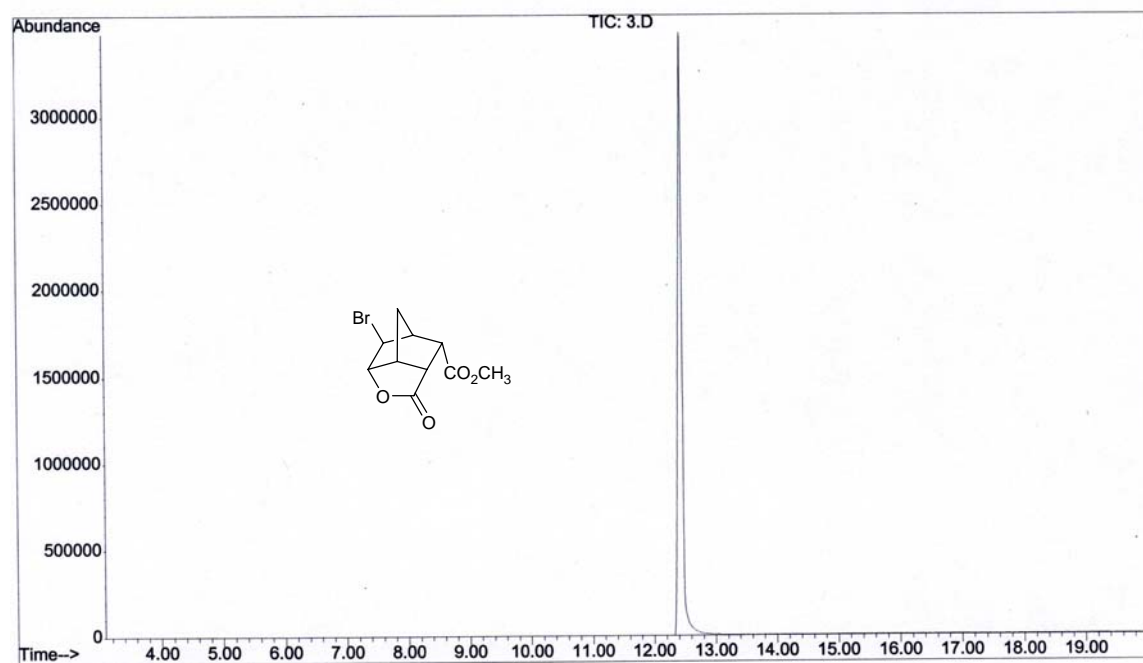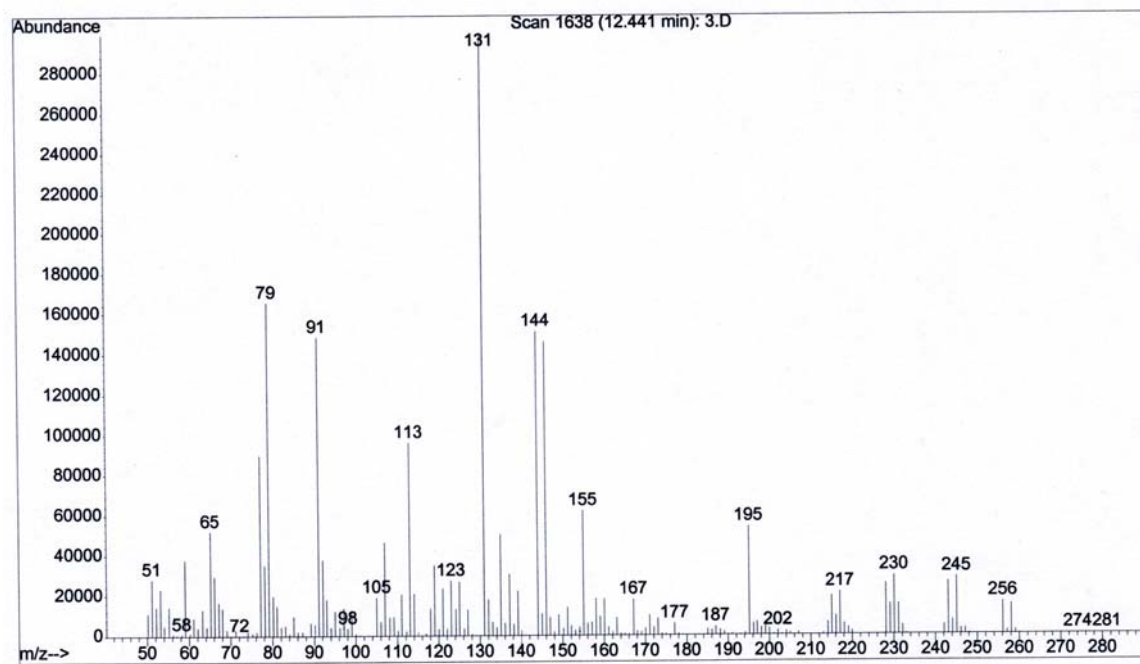GC-MS of bromolactone ester **18**.

STANDARD 1H OBSERVE

Archive directory: /export/home/vnmr1/vnmrsys/data  
Sample directory: trans-4-L-0\_16Jan2004Pulse Sequence: s2pul  
Solvent: CDC13  
Temp. 40.0 C / 313.1 K  
File: 02-21-08\_0  
Mercury-400BB "Indian"Relax. delay 2.000 sec  
Pulse 51.8 degrees  
Acq. time 2.000 sec  
Width 6410.3 Hz  
2 repetitions  
OBSERVE H1, 400.6260347 MHz  
DATA PROCESSING  
FT size 32768  
Total time 0 min, 21 sec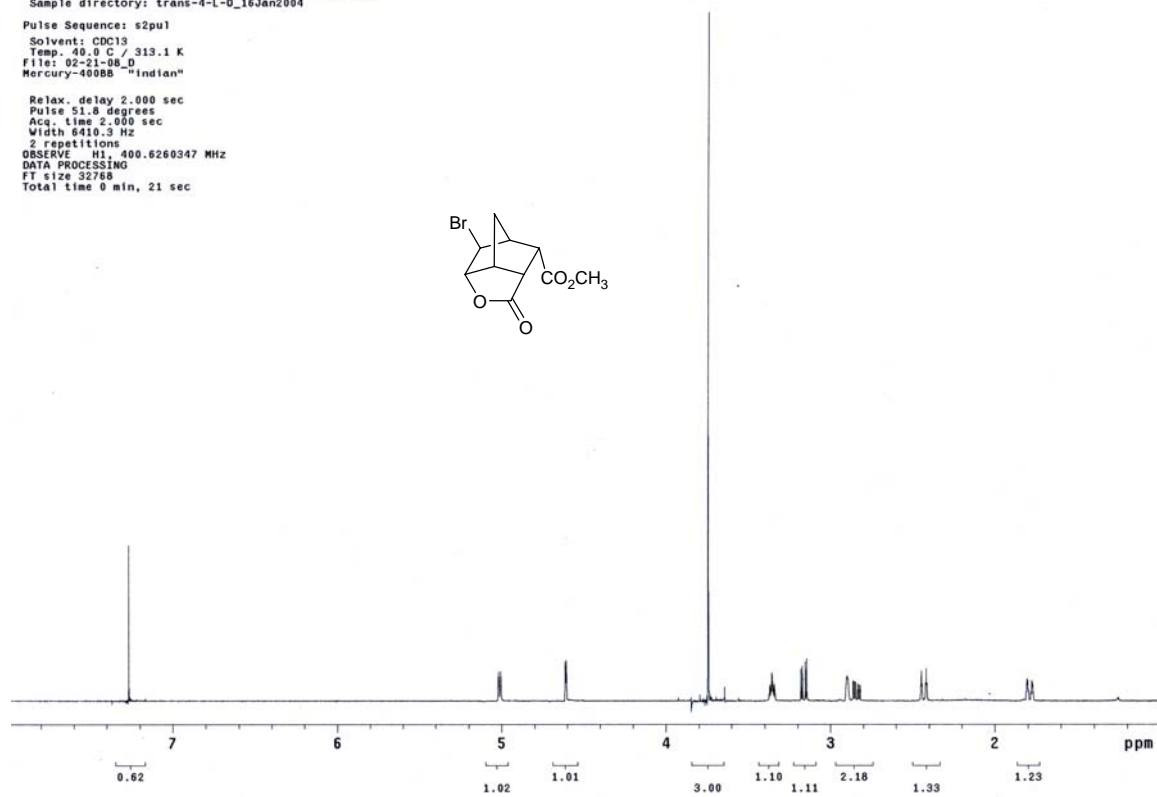<sup>1</sup>H NMR of bromolactone ester **18**.

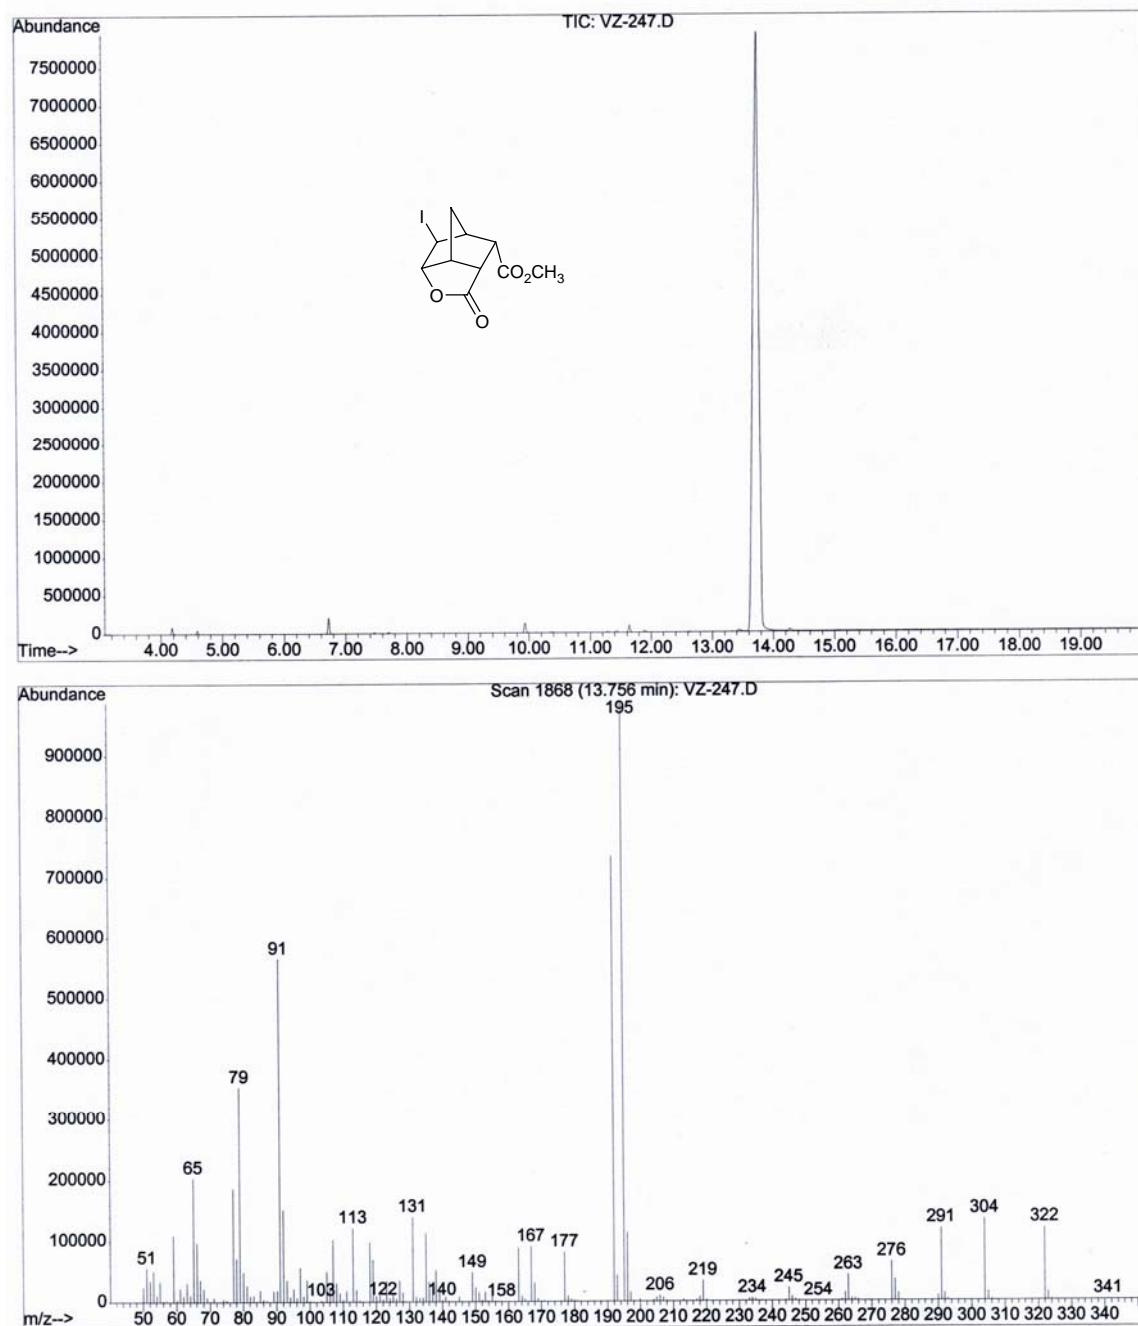GC-MS of iodolactone ester **19**.

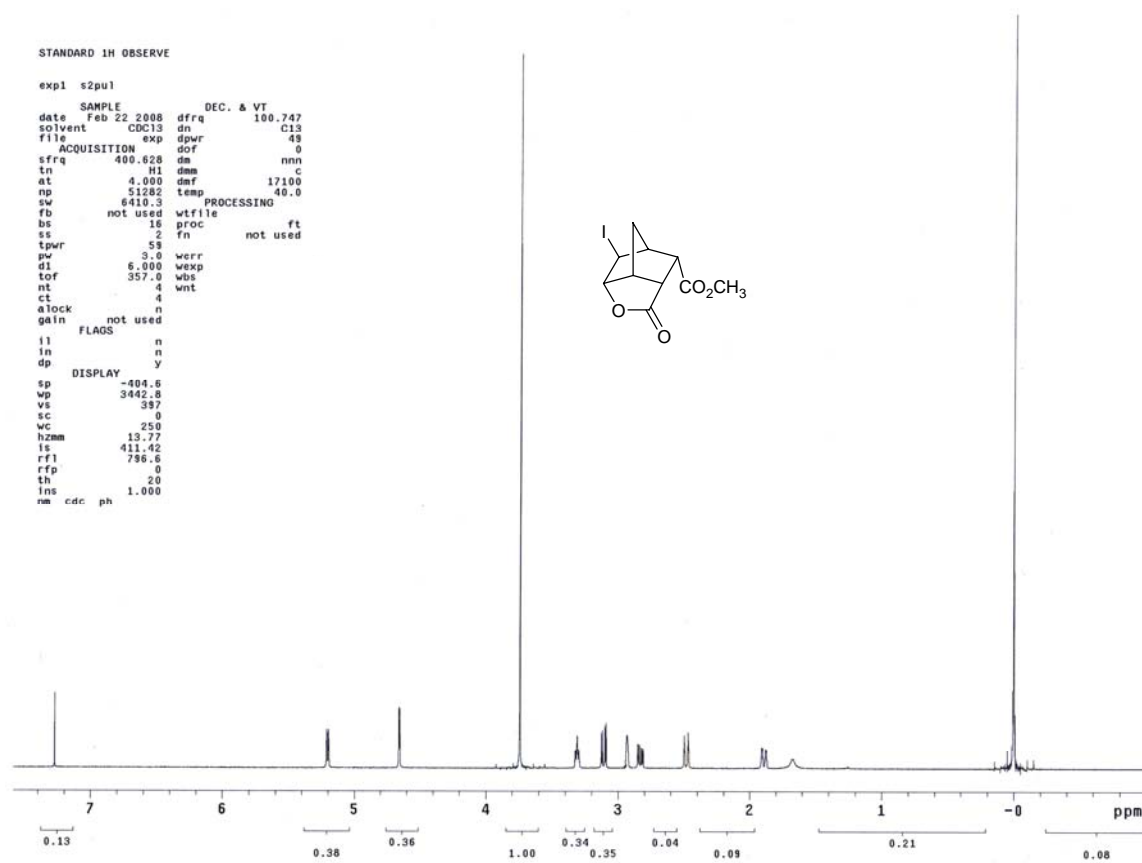

$^1\text{H}$  NMR of iodolactone ester **19**.



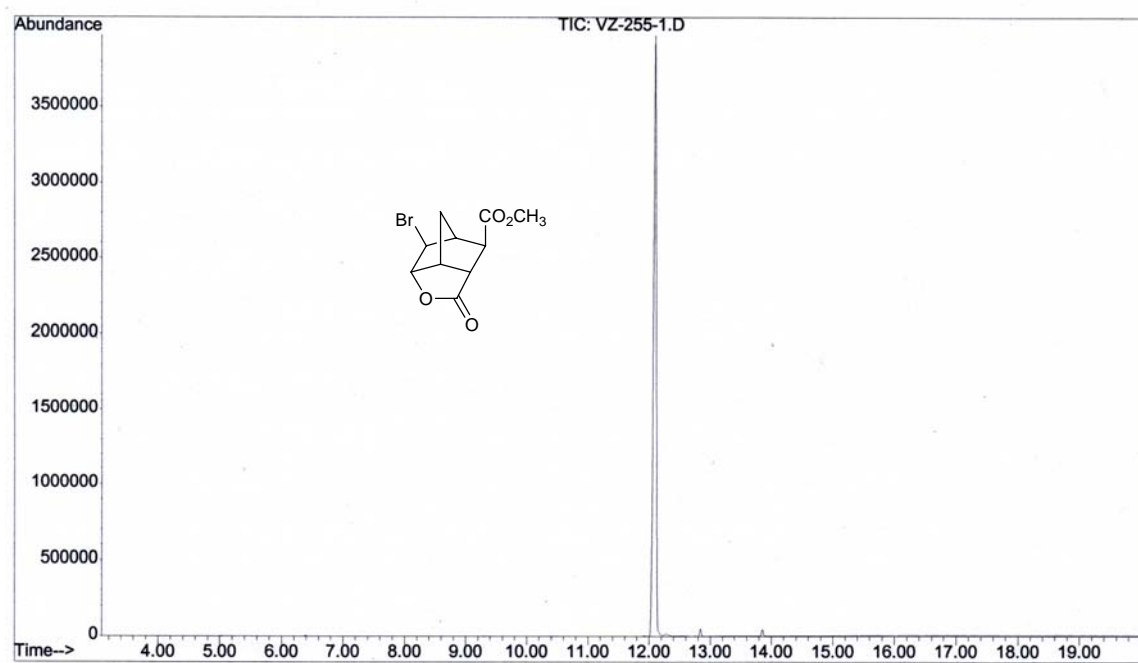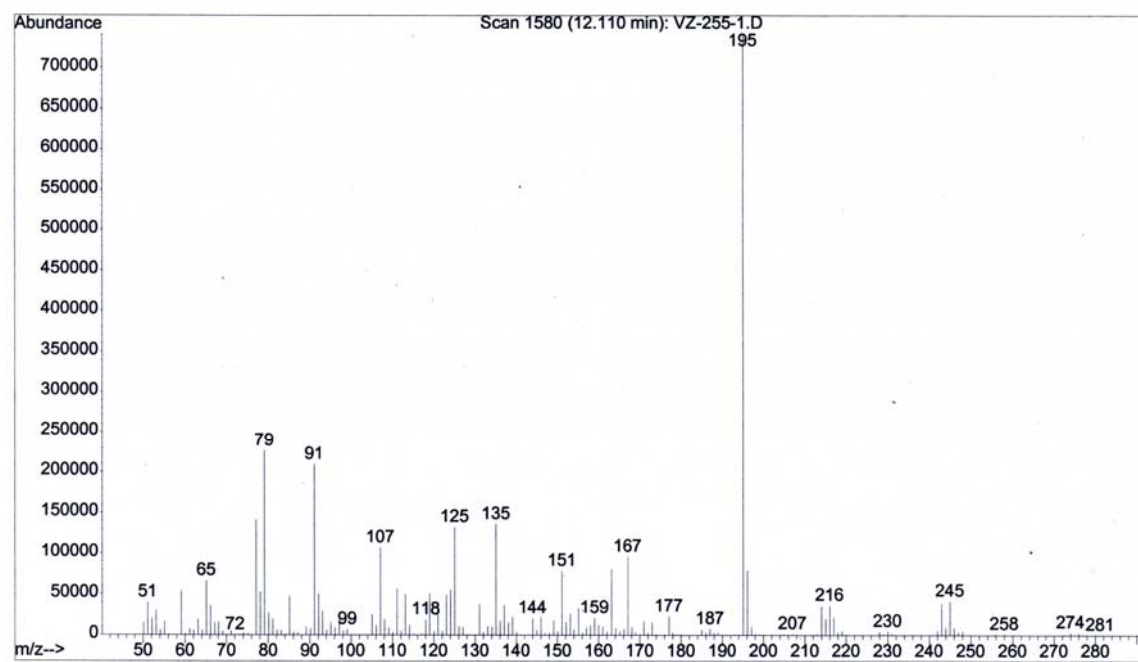GC-MS of bromolactone ester **21**.

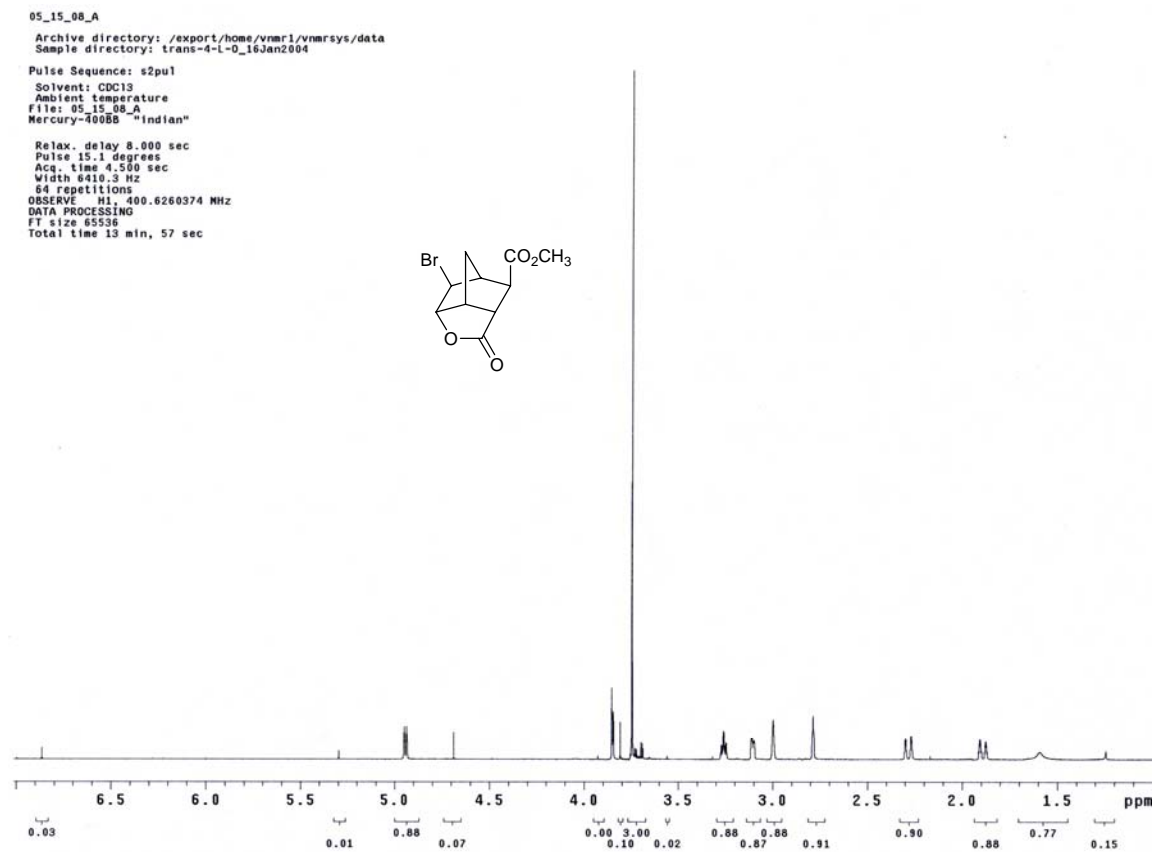

<sup>1</sup>H NMR of bromolactone ester **21**.

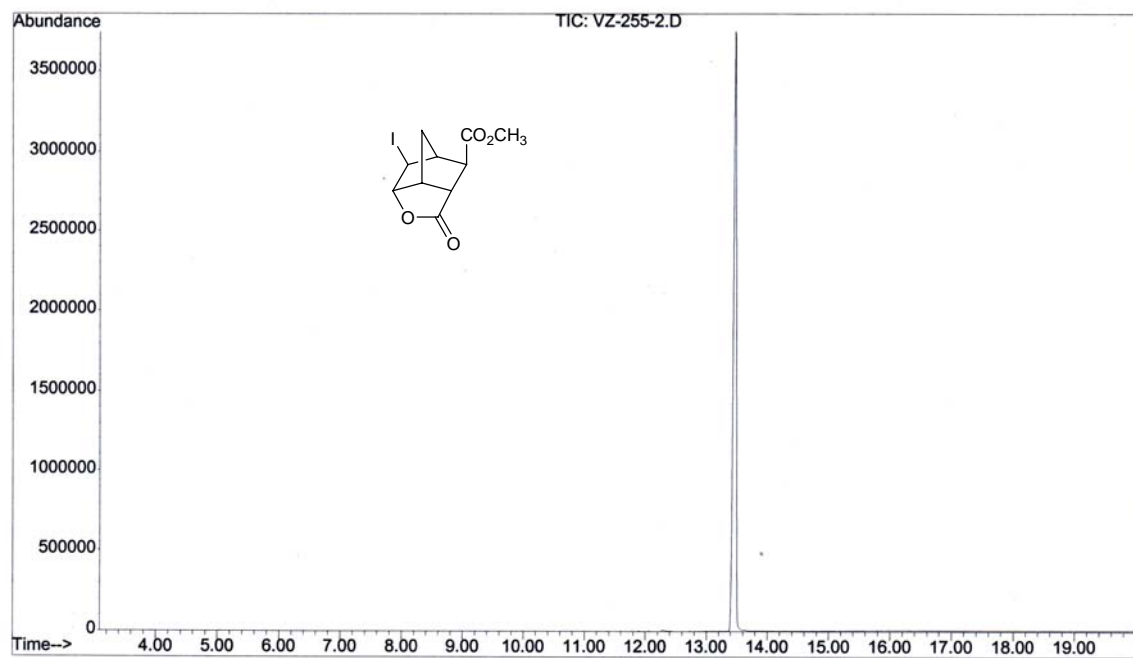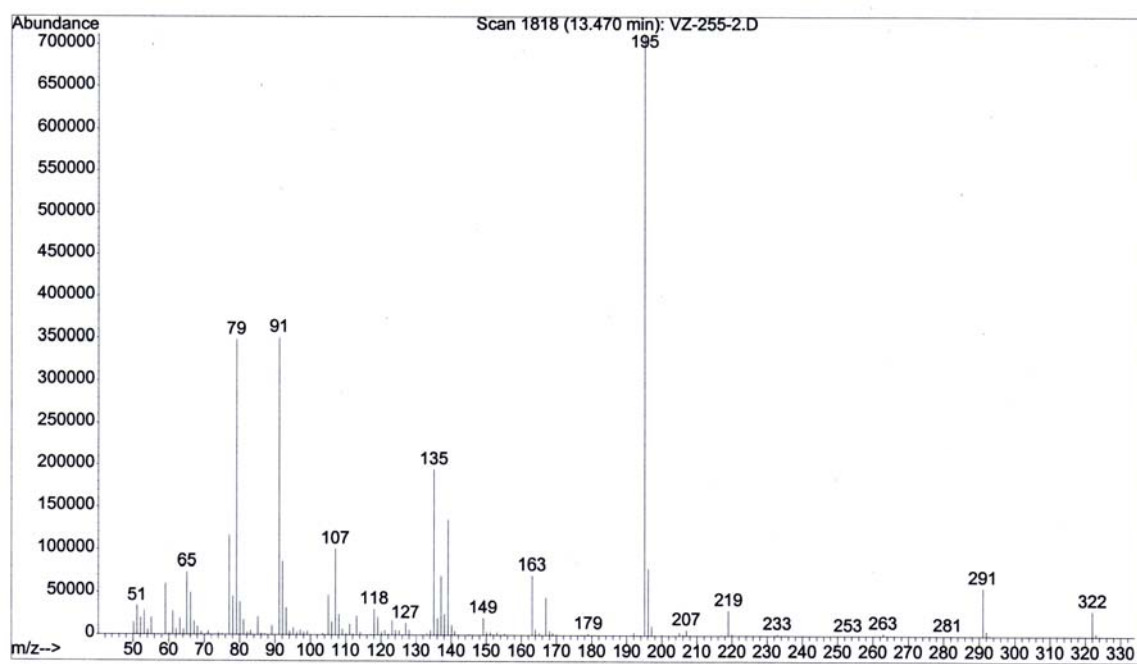GC-MS of iodolactone ester **22**.

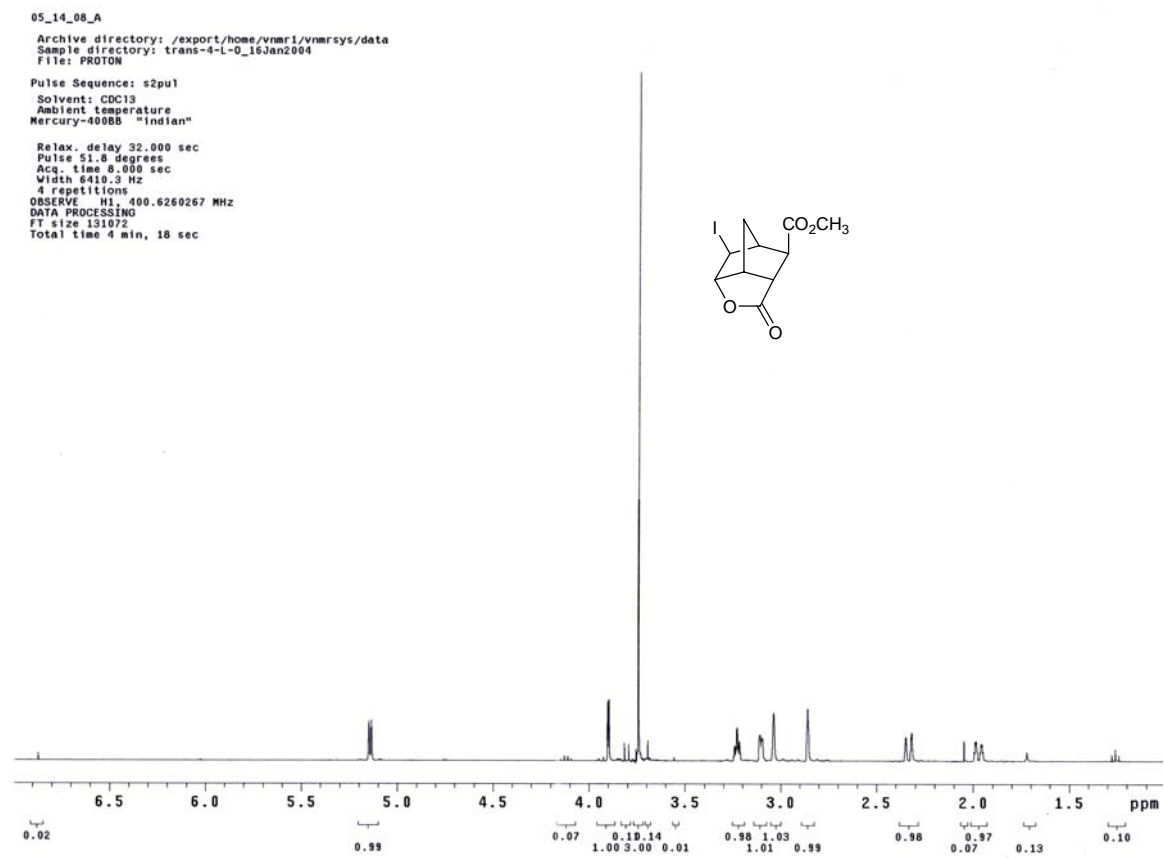

$^1\text{H}$  NMR of iodolactone ester **22**.
